# Supplementary material for: The Experimental Infection of Goats with Small Ruminant Morbillivirus Originated from Barbary Sheep
Source: MDPI journal article supplement (doi:10.3390/pathogens11090991), 2022-08-30

**Figure S1-A.** ID rapid PPR antigen dipstick field test results of nasal swab. Negative (-) control band visible test band not -, questionable ((+)) control band visible and barely visible test band, low positive (+) test band visible but not strong colour as control band, moderate positive (++) test band same visible colour as control band, high positive (+++) test band stronger colour than control band.

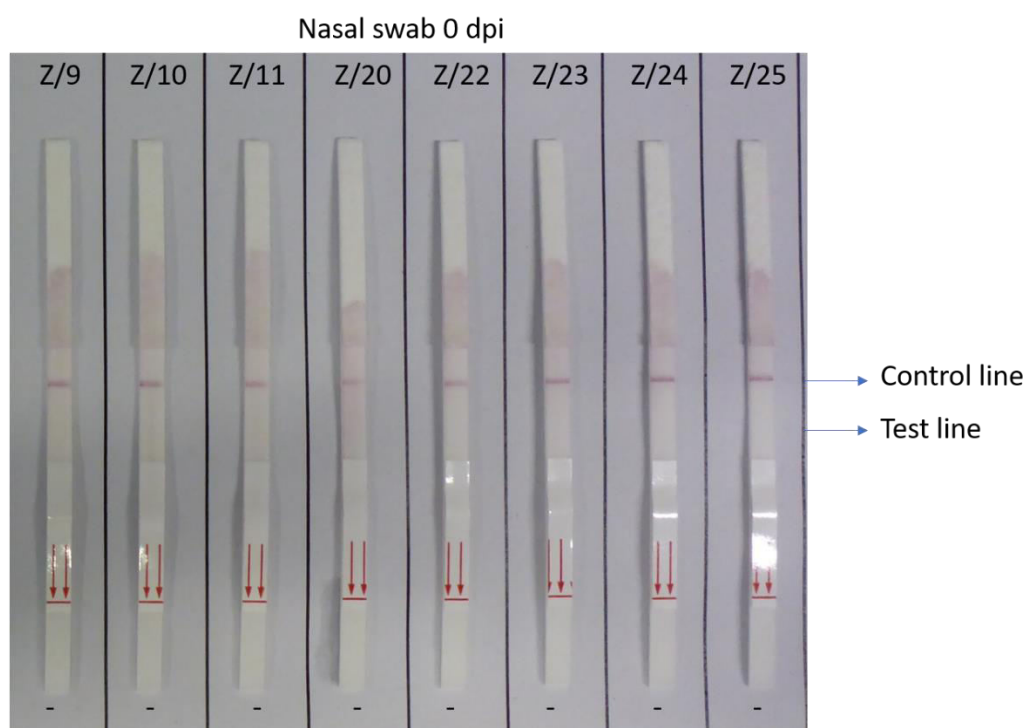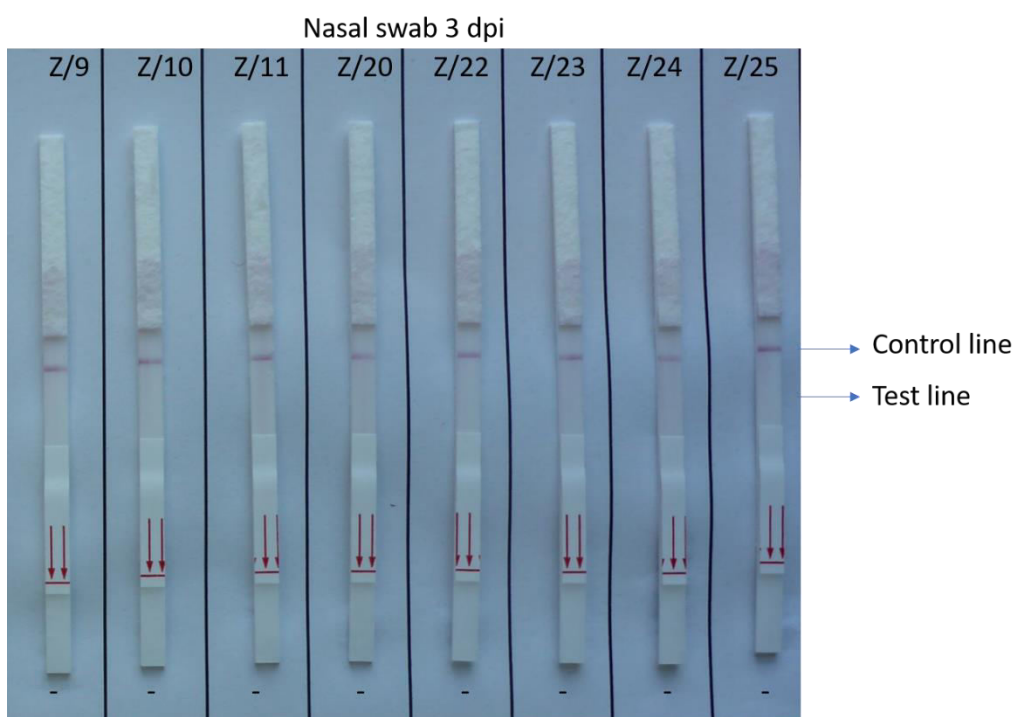

Nasal swab 5 dpi

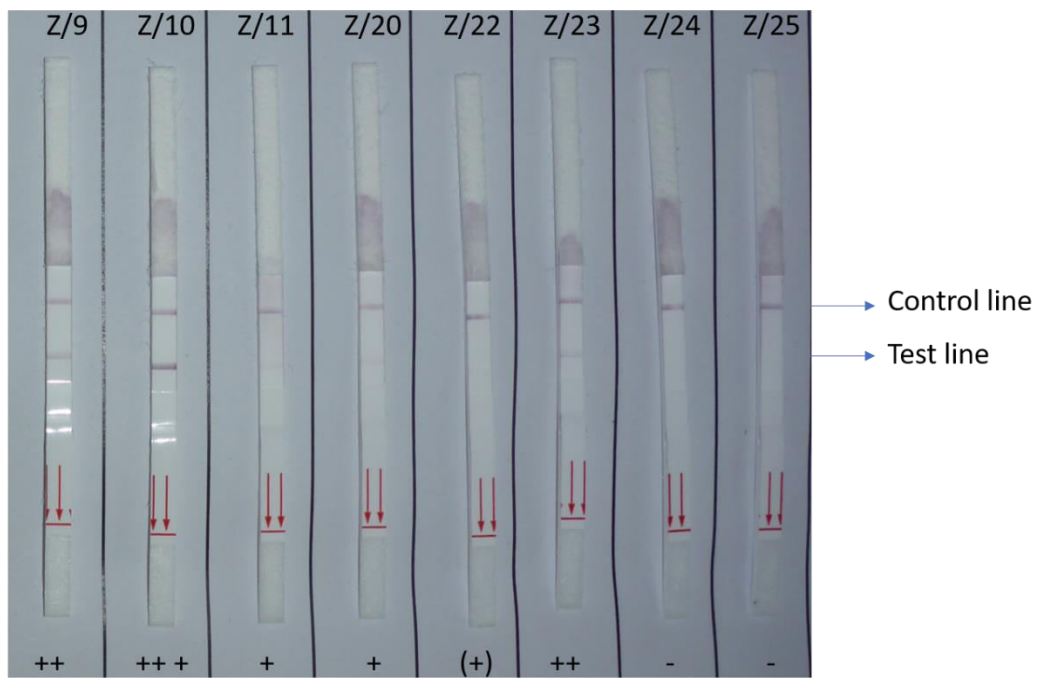

Nasal swab 7 dpi

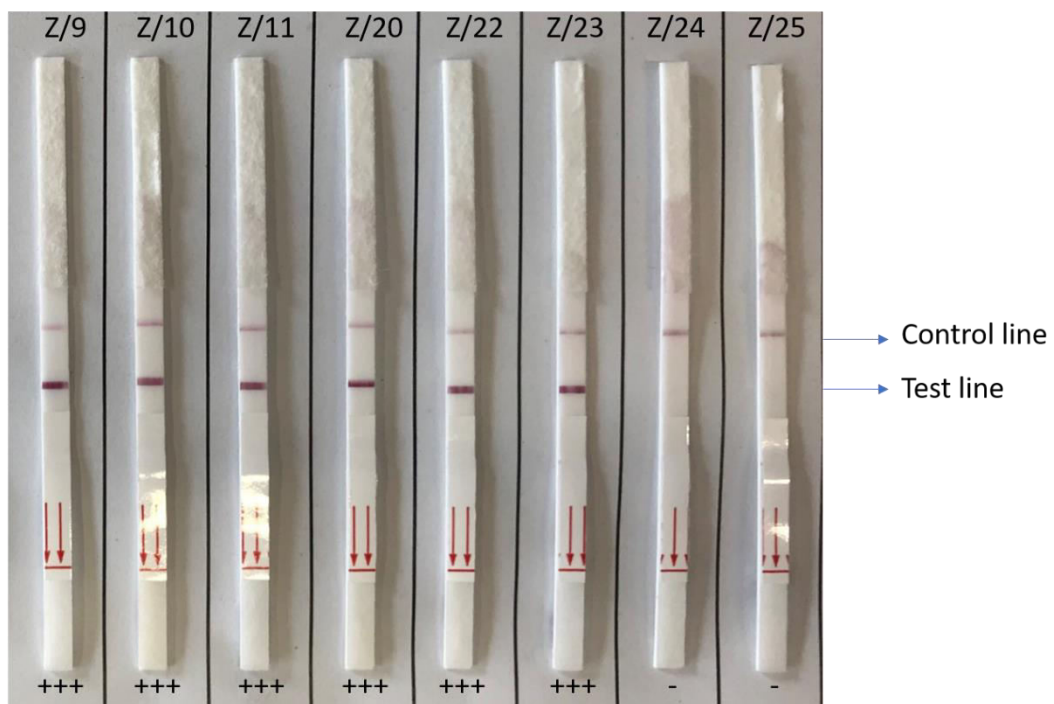

Nasal swab 10 dpi

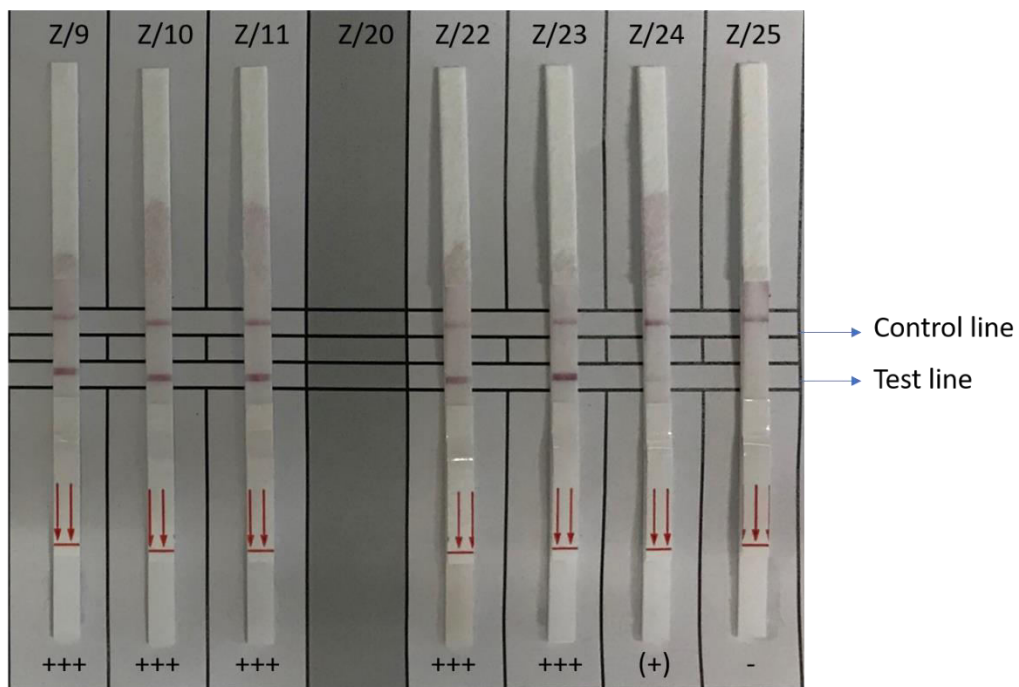

Nasal swab 12 dpi

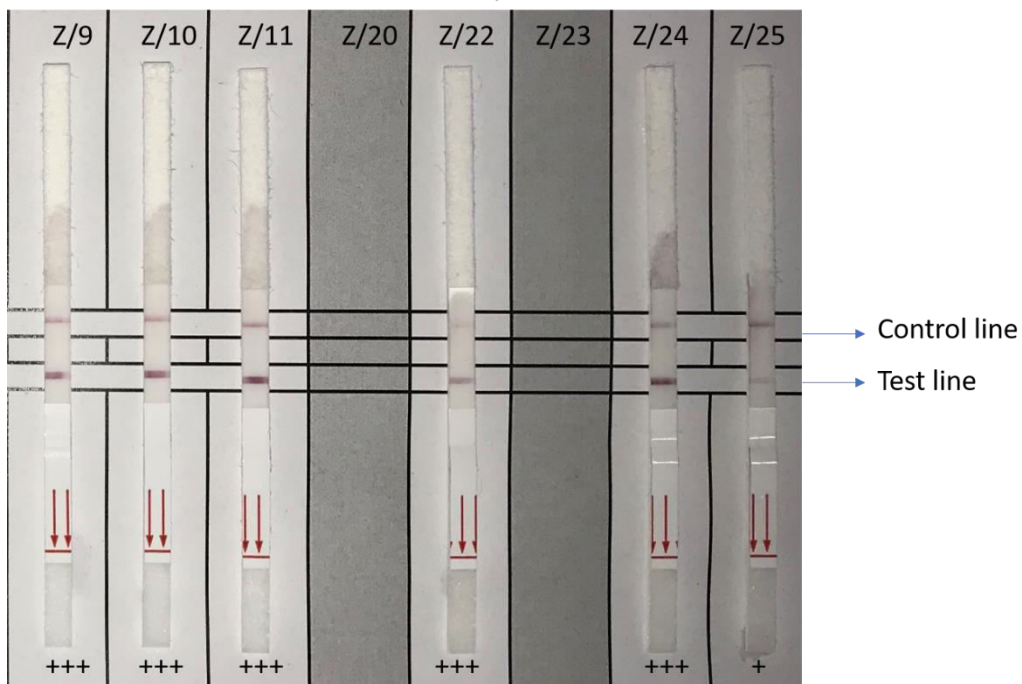

Nasal swab 14 dpi

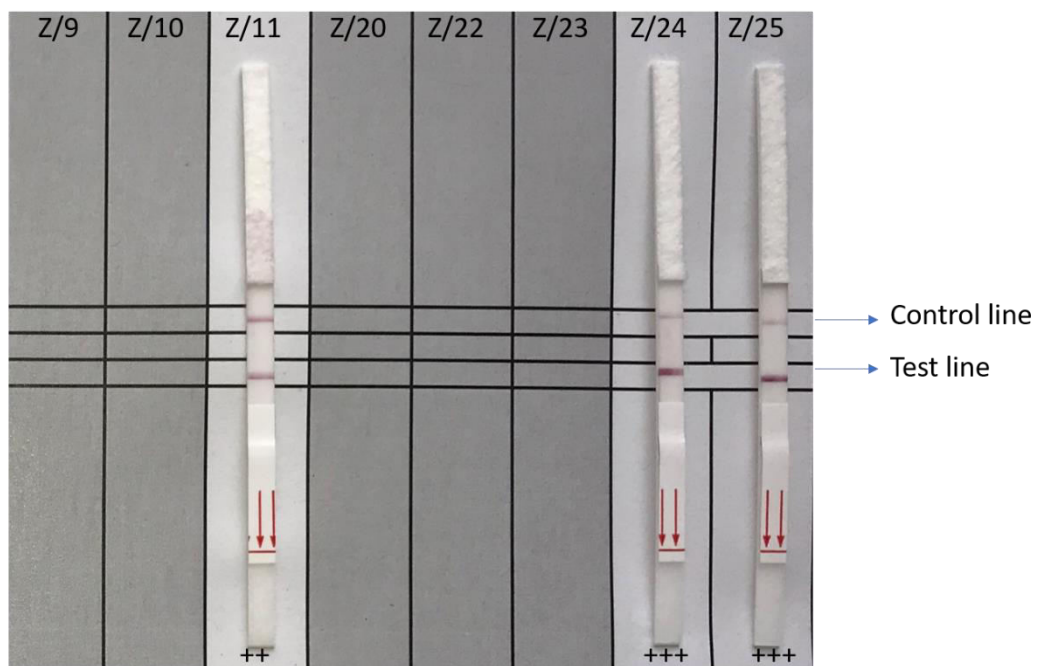

Nasal swab 17 dpi

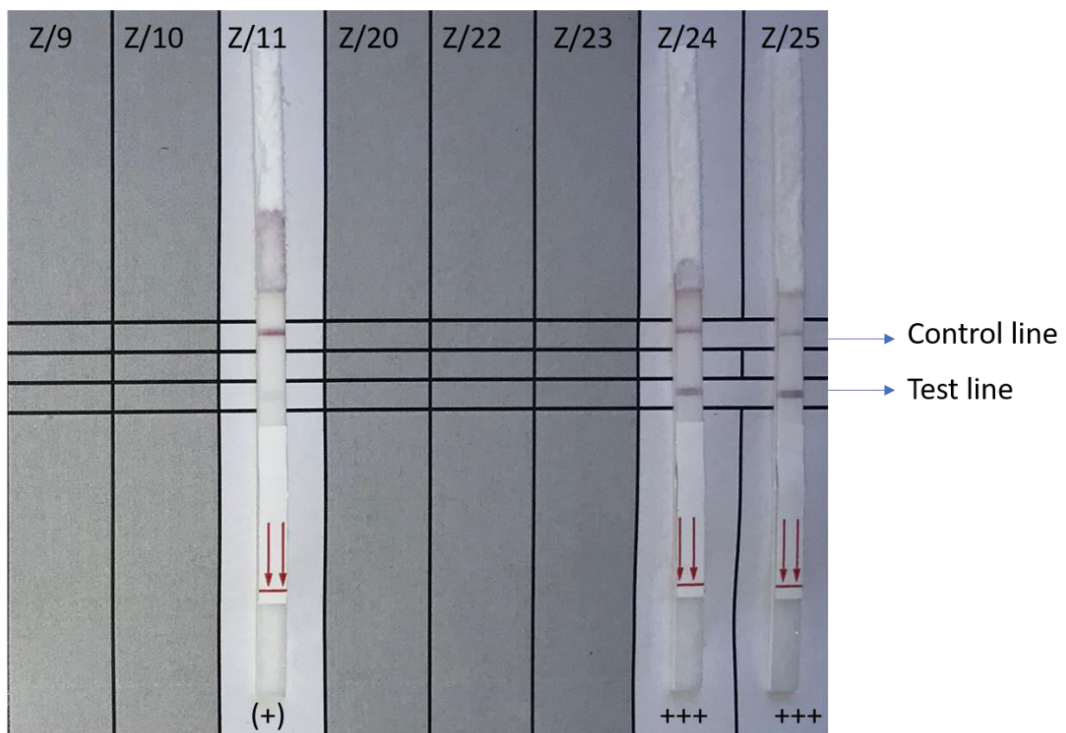

Nasal swab Z/11

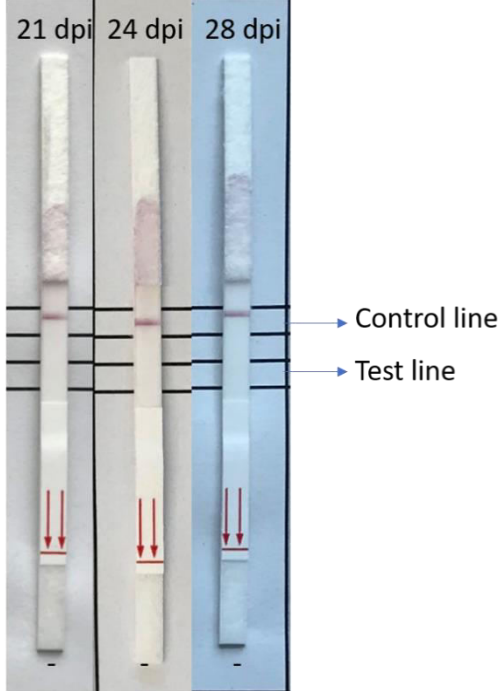

**Figure S1-B.** ID rapid PPR antigen dipstick field test results of conjunctival swab. Negative (-) control band visible test band not -, questionable ((+)) control band visible and barely visible test band, low positive (+) test band visible but not strong colour as control band, moderate positive (++) test band same visible colour as control band, high positive (+++) test band stronger colour than control band.

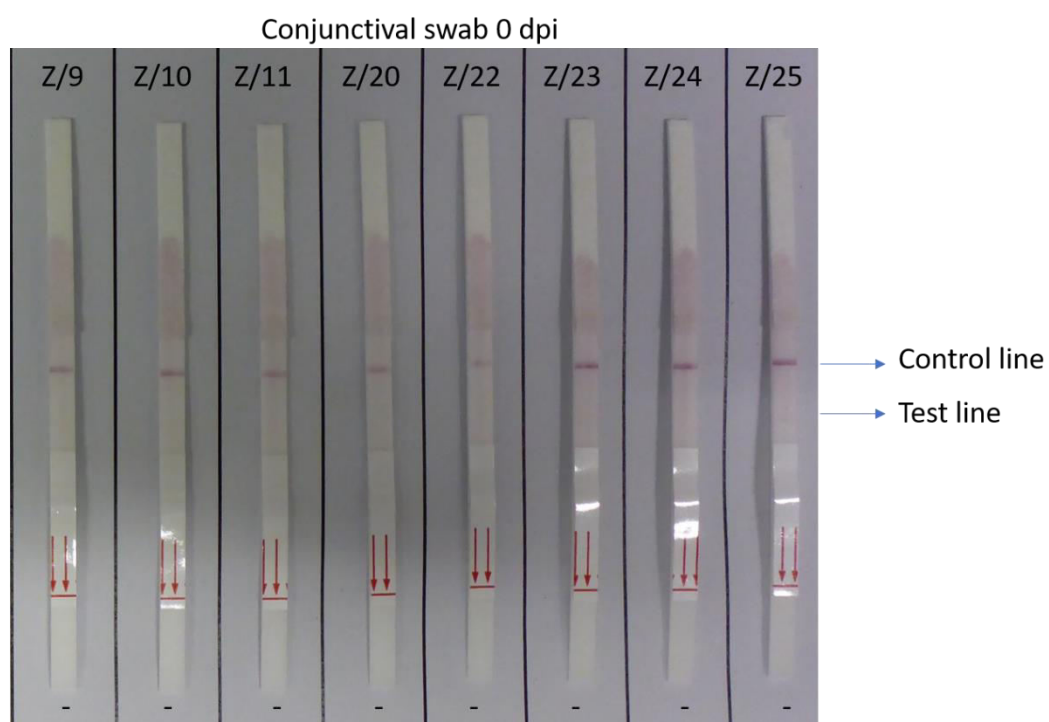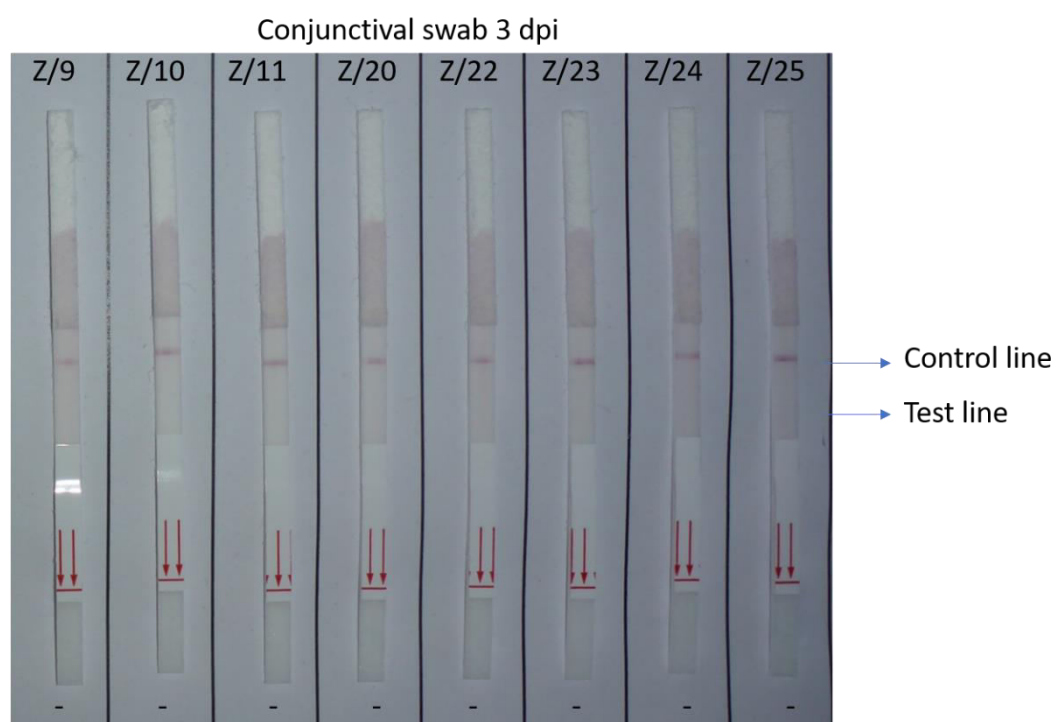



Conjunctival swab 5 dpi

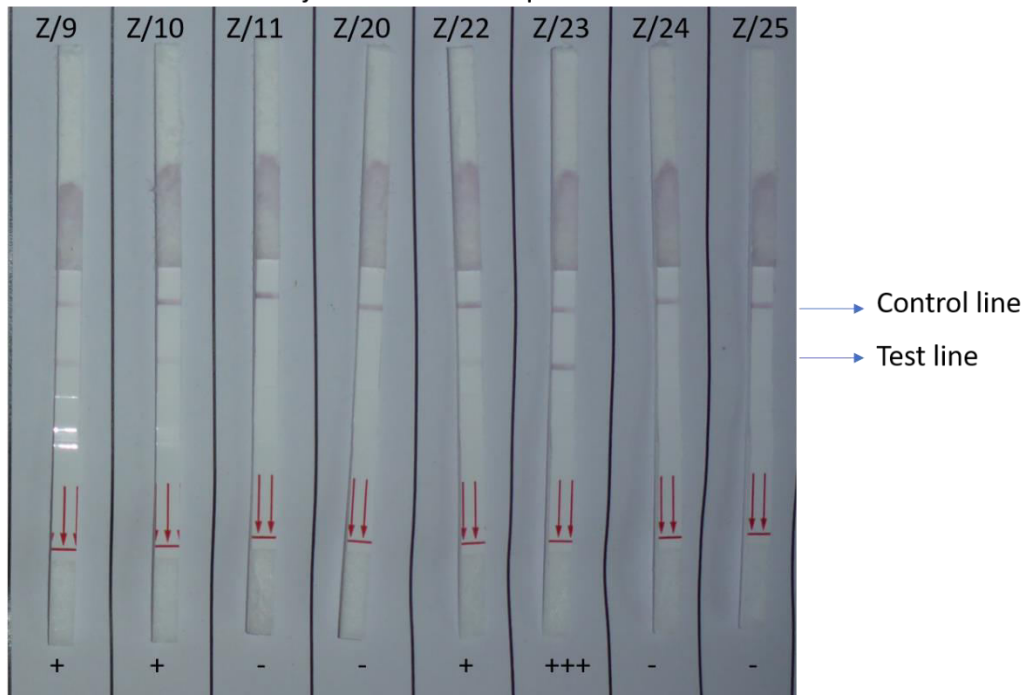

Conjunctival swab 7 dpi

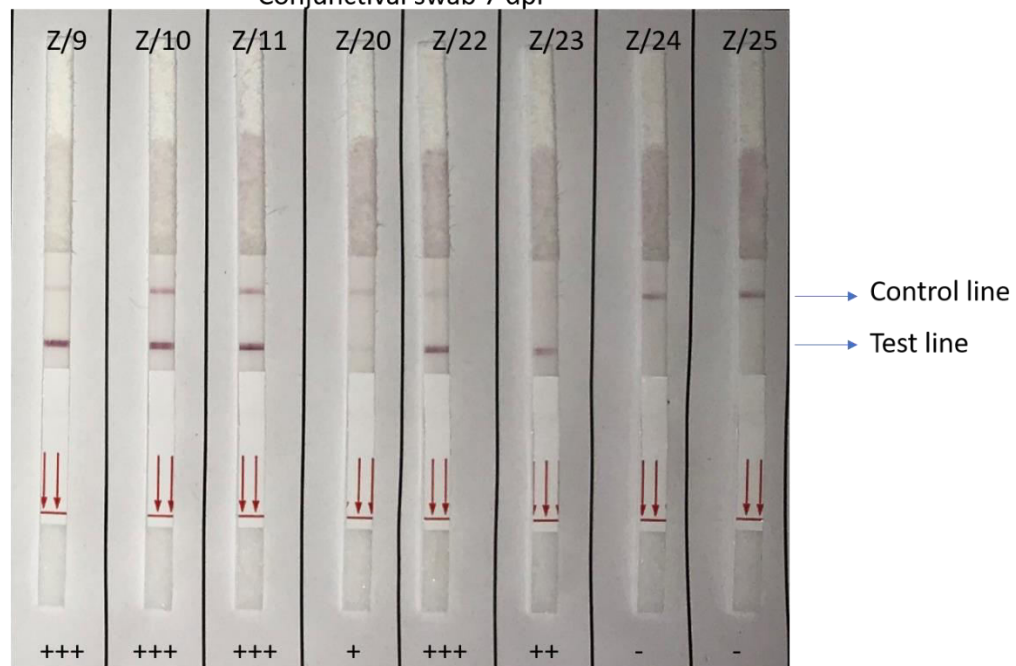

Conjunctival swab 10 dpi

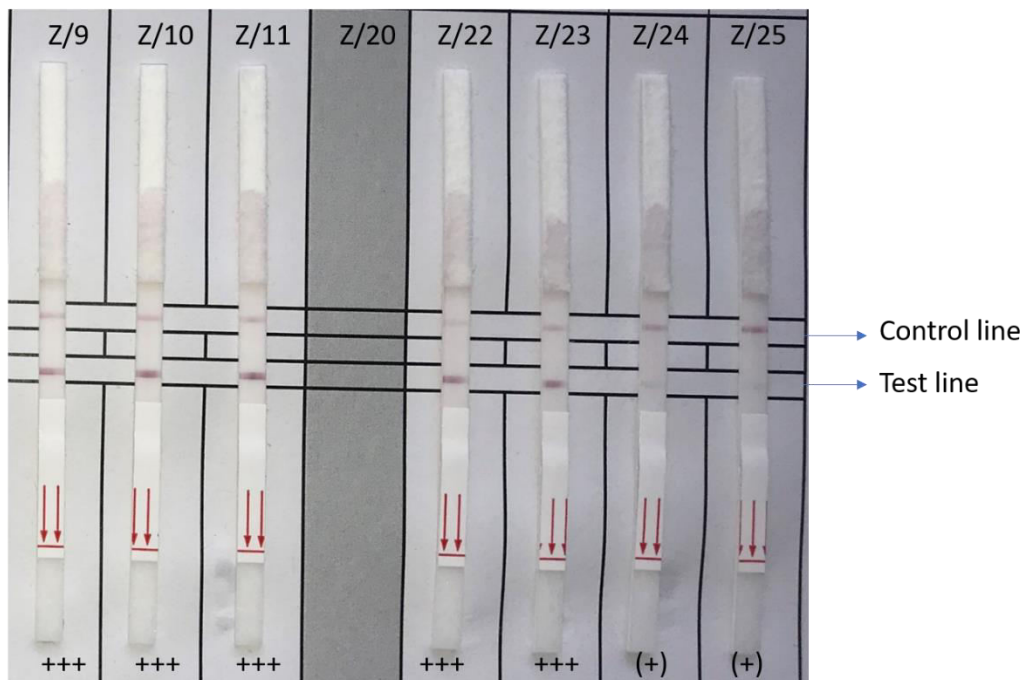

Conjunctival swab 12 dpi

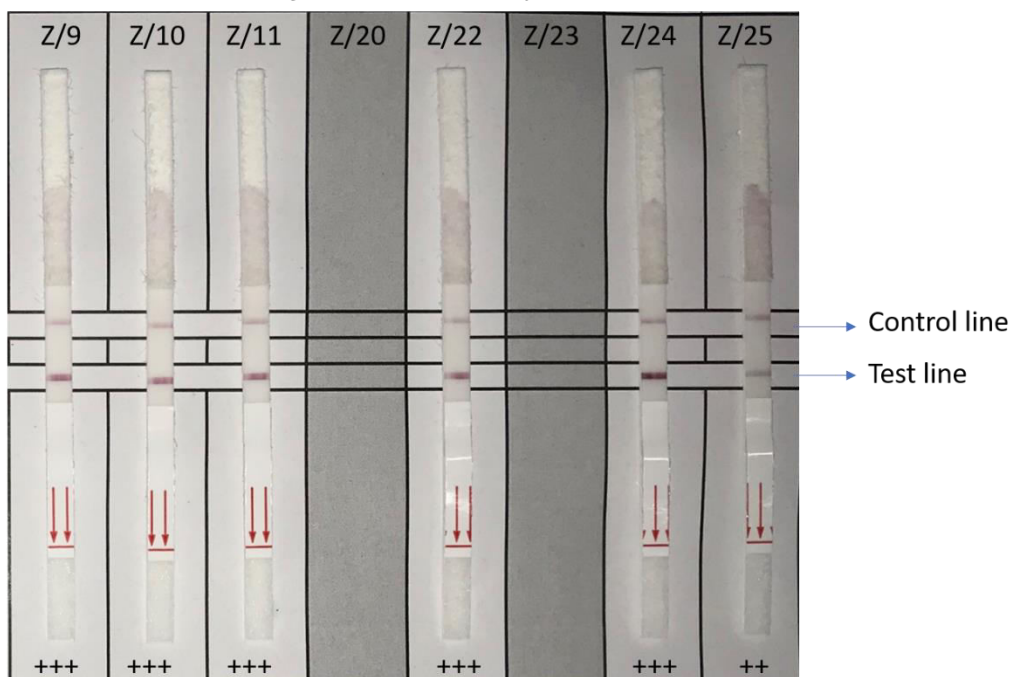



Conjunctival swab 14 dpi

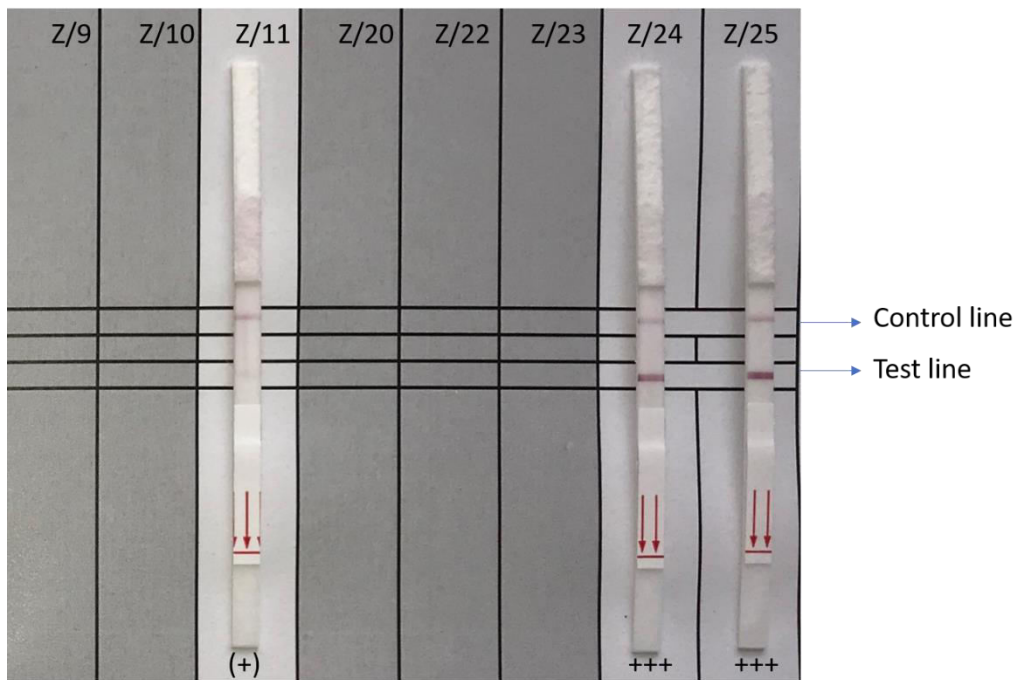

Conjunctival swab 17 dpi

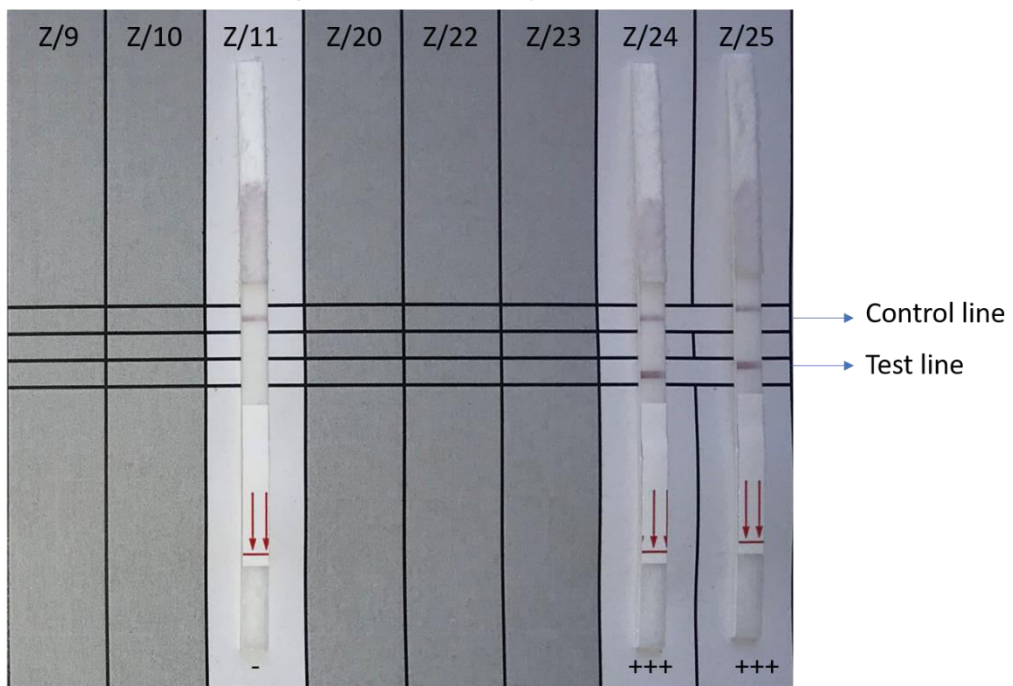

Conjunctival swab Z/11

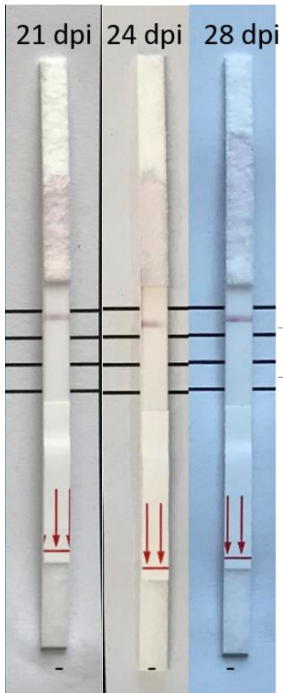

→ Control line

→ Test line

**Figure S1-C.** ID rapid PPR antigen dipstick field test results of live and antibody neutralized SRMV cell culture isolate. Negative (-) control band visible test band not -, questionable ((+)) control band visible and barely visible test band, low positive (+) test band visible but not strong colour as control band, moderate positive (++) test band same visible colour as control band, high positive (+++) test band stronger colour than control band.

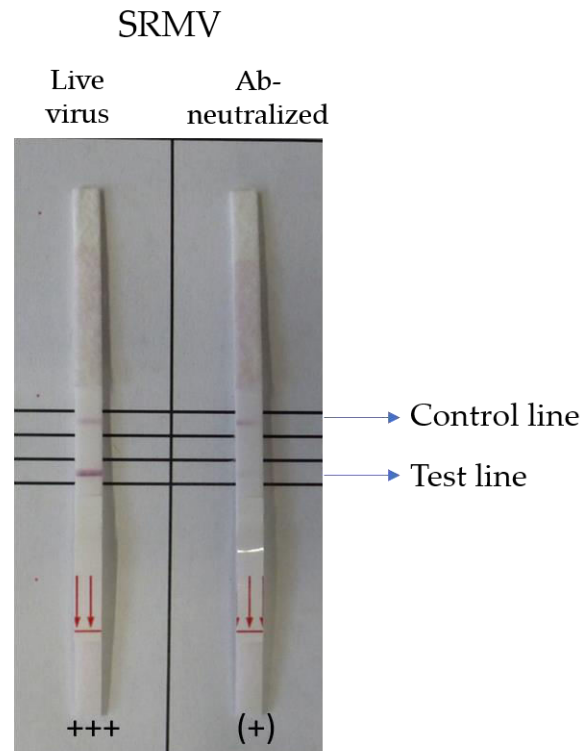

Supplement: s1 [file s1]
